# Supplementary material for: ViscumTT induces apoptosis and alters IAP expression in osteosarcoma in vitro and has synergistic action when combined with different chemotherapeutic drugs
Source: BMC Complement Altern Med. 2017 Jan 7;17:26. doi: 10.1186/s12906-016-1545-7 (PMC5219806; doi:10.1186/s12906-016-1545-7)
Supplement: Additional file 1: — Mean and standard deviation of the single values for each graph. (XLS 106 kb) [file 12906_2016_1545_MOESM1_ESM.xls]

## Sheet: Figure 1_LDH, Proliferation
LDH release 143B				LDH release SaOS-2
viscum concentration	viscum			viscum concentration	viscum
ng/mL	[%] LDH release	SD		ng/mL	[%] LDH release	SD
Ctrl	0.00	0.00		Ctrl	0.00	0.00
2.5	0.82	6.08		2.5	4.1	2.4
5	0.97	5.4		5	4.7	2.75
10	-0.06	4.55		10	10.4	6.01
TT concentration	TT			TT concentration	TT
µg/mL	[%] LDH release	SD		µg/mL	[%] LDH release	SD
Ctrl	0.00	0.00		Ctrl	0.00	0.00
40	8.98	2.52		40	3.89	3.8
50	9.28	4.21		50	6.84	6
60	7.25	7.41		60	3.03	3
viscumTT	viscumTT			viscumTT	viscumTT
conc. OA+ML	[%] LDH release	SD		conc. OA+ML	[%] LDH release	SD
Ctrl	0.00	0.00		Ctrl	0.00	0.00
2.5 + 40	9.51	4.88		2.5 + 40	4.71	4.3
5 + 50	6.82	0.56		5 + 50	4.85	4.2
10 + 60	8.04	0.74		10 + 60	6.5	1
CASY Cell Proliferation 143B 24h				CASY Cell Proliferation 143B 48h				CASY Cell Proliferation SaOS-2 24h				CASY Cell Proliferation SaOS-2 48h
viscum concentration	viscum			viscum concentration	viscum			viscum concentration	viscum			viscum concentration	viscum
ng/mL	[%] proliferation	SD		ng/mL	[%] proliferation	SD		ng/mL	[%] proliferation	SD		ng/mL	[%] proliferation	SD
Ctrl	100	0.00		Ctrl	100	0		Ctrl	100	0		Ctrl	100	0
2.5	61.31	12.1817		1.5	34.73	3.9891		2.5	93,6972	5,8658		2.5	85,0419	6,4371
5	58.69	1.6618		2	27.32	3.5809		5	87,9221	1,9424		5	82,3281	2,9553
10	42.94	3.7885		2.5	24.11	2.6513		10	76,6160	5,7502		10	80,6218	3,4549
TT concentration	TT			TT concentration	TT			TT concentration	TT			TT concentration	TT
µg/mL	[%] proliferation	SD		µg/mL	[%] proliferation	SD		µg/mL	[%] proliferation	SD		µg/mL	[%] proliferation	SD
Ctrl	100	0.00		Ctrl	100	0		Ctrl	100	0		Ctrl	100	0
40	98.1023	3.7918		20	75.823	2.9997		40	87.22	6.45		40	87.228	3.5521
50	91.8611	7.1229		30	66.6576	1.362		50	83.87	7.01		50	87.228	3.5521
60	80.7483	5.7967		40	57.5064	2.4183		60	65.2	12.5		60	72.1023	2.6256
viscumTT	viscumTT			viscumTT	viscumTT			viscumTT	viscumTT			viscumTT	viscumTT
conc. OA+ML	[%] proliferation	SD		conc. OA+ML	[%] proliferation	SD		conc. OA+ML	[%] proliferation	SD		conc. OA+ML	[%] proliferation	SD
Ctrl	100	0.00		Ctrl	100	0		Ctrl	100	0		Ctrl	100	0
2.5 + 40	69.3809	1.4342		1.5 + 20	34.5791	3.2891		2.5 + 40	80.202	3.2891		2.5 + 40	78.9	11
5 + 50	56.6576	2.9197		2 + 30	25.7	2.3557		5 + 50	53.0421	2.3557		5 + 50	59.0587	2.3357
10 + 60	30.2467	5.1192		2.5 + 40	29.67	3.4125		10 + 60	34.5287	3.4125		10 + 60	49.0604	8.2922
WST-1 Cell Proliferation 143B				WST-1 Cell Proliferation SaOS-2
viscum concentration	viscum			viscum concentration	viscum
ng/mL	[%] proliferation	SD		ng/mL	[%] proliferation	SD
Ctrl	100	0		Ctrl	100	0
2.5	48.198	0.7924		2.5	89.8105	1.9963
5	45.4814	8.2609		5	72.8253	14.603
10	41.7009	7.8608		10	55.7614	26.5906
TT concentration	TT			TT concentration	TT
µg/mL	[%] proliferation	SD		µg/mL	[%] proliferation	SD
Ctrl	100	0		Ctrl	100	0
40	93.2447	92.518		40	81.9877	3.4228
50	88.2765	13.9452		50	65.539	5.0313
60	76.6907	8.1441		60	49.5527	15.2984
viscumTT	viscumTT			viscumTT	viscumTT
conc. OA+ML	[%] proliferation	SD		conc. OA+ML	[%] proliferation	SD
Ctrl	100	0		Ctrl	100	0
2.5 + 40	49.251	7.7141		2.5 + 40	41.7534	5.5267
5 + 50	22.178	5.4409		5 + 50	27.7858	5.6656
10 + 60	10.6522	4.8901		10 + 60	45.467	0.872

## Sheet: Fig 2 Anx+JC1
Apoptosis induction 143B 24h				Apoptosis induction 143B 48h				Apoptosis induction Saos-2 24h				Apoptosis induction Saos-2 48h
viscum concentration	viscum	stdv		viscum concentration	viscum			viscum concentration	viscum			viscum concentration	viscum
ML ng/mL	[%] anx pos cells			ML ng/mL	[%] anx pos cells	SD		ML ng/mL	[%] anx pos cells	SD		ML ng/mL	[%] anx pos cells	SD
ctrl	7.331	2.5916		ctrl	6.0594	2.0714		ctrl	6.23	2.23		ctrl	8.294	1.4758
2.5	8.78	3.3		1.5	20.0235	5.658		2.5	8.39	2.73		1.5	10.1133	1.6103
5	10.18	3.04		2	29.031	6.9184		5	10.98	2.24		2	11.53	2.3559
10	16.51	3.39		2.5	39.9	7.508		10	21	7.67		2.5	12.23	2.1567
				5	68.78	7.99						5	21.058	3.7202
TT concentration	TT	stdv		TT concentration	TT			TT concentration	TT			TT concentration	TT
OA µg/mL	[%] anx pos cells			OA µg/mL	[%] anx pos cells	SD		OA µg/mL	[%] anx pos cells	SD		OA µg/mL	[%] anx pos cells	SD
Ctrl	7.331	2.5916		Ctrl	6.0594	2.0714		Ctrl	6.23	2.23		Ctrl	8.294	1.4758
40	8.59	2.96		20	5.19	0.7606		40	11.69	3.35		20	14.3175	3.5758
50	30.7	1.67		30	7.936	1.2674		50	18.19	6.81		30	14.6633	1.8153
60	52.45	4.5		40	17.5606	6.1355		60	37.85	7.02		40	32.1183	5.914
				50	47.61	7.91						50	63.606	3.1338
viscumTT	TT	stdv		viscumTT	viscumTT			viscumTT	viscumTT			viscumTT	viscumTT
conc. OA+ML	[%] anx pos cells			conc. OA+ML	[%] anx pos cells	SD		conc. OA+ML	[%] anx pos cells	SD		conc. OA+ML	[%] anx pos cells	SD
ctrl	7.331	2.5916		Ctrl	6.0594	2.0714		ctrl	6.23	2.23		Ctrl	8.294	1.4758
2.5 + 40	25.31	6.11		1.5 + 20	40	4.8		2.5 + 40	21.34	9.15		1.5 + 20	14.965	1.9163
5 + 50	46.82	1.61		2 + 30	69.6	3.84		5 + 50	41.93	8.47		2 + 30	21.812	2.2726
10 + 60	77.77	7.05		2.5 + 40	84.53	2.41		10 + 60	87.84	8.82		2.5 + 40	44.884	4.2965
				5 + 50	93.7005	1.52						5 + 50	86.57	2.9596
JC1 measurement	143B							JC1 measurement	SaOS-2
viscum concentration	viscum	stdv						viscum concentration	viscum
ML ng/mL	[%] low MMP							ML ng/mL	[%] low MMP	SD
ctrl	8.282	0.5671						ctrl	7.945	4.4634
CCCP	95.205	5.0326						CCCP	95.205	5.0326
2.5	6.904	1.6716						2.5	11.6825	3.9307
5	8.228	0.7795						5	17.04	3.9304
10	13.534	2.8852						10	30.1	1.3736
TT concentration	TT	stdv						TT concentration	TT
OA µg/mL	[%] low MMP							OA µg/mL	[%] low MMP	SD
Ctrl	8.282	0.5671						Ctrl	7.945	4.4634
CCCP	95.205	5.0326						CCCP	95.205	5.0326
40	6.614	2.459						40	12.2533	4.8916
50	11.08	2.8594						50	22.2	9.5687
60	14.8	2.4749						60	39.7	1.19817
viscumTT	viscumTT	stdv						viscumTT	viscumTT
conc. OA+ML	[%] low MMP							conc. OA+ML	[%] low MMP	SD
ctrl	8.282	0.5671						ctrl	7.945	4.4634
CCCP	95.205	5.0326						CCCP	95.205	5.0326
2.5 + 40	13.72	17.795						2.5 + 40	24.1	1.1158
5 + 50	15.775	42.79						5 + 50	55.775	1.15604
10 + 60	27.725	58.321						10 + 60	80.5	7.0661

## Sheet: Figure 3 CASP8, CASP9, Inhibiti
active caspase 143B						active caspase Saos-2
viscum concentration	caspase-9		caspase-8			viscum concentration	caspase-9		caspase-8
ML ng/mL	[%] C9 pos cells	SD	[%] C8 pos cells	SD		ML ng/mL	[%] C9 pos cells	SD	[%] C8 pos cells	SD
Ctrl	14.3	0	7.99	4.4406		Ctrl	7.626	3.9941	8.5475	2.3717
2.5	16.2775	5.9889	8.31	2.1844		2.5	6.874	2.8309	12.1225	3.7969
5	15.0133	5.4819	10.4133	0.9411		5	8.375	1.1597	16.505	8.0605
10	36.375	5.7629	10.8567	1.8808		10	19.688	8.0087	42.715	0.1626
TT concentration	caspase-9		caspase-8			TT concentration	caspase-9		caspase-8
OA µg/mL	[%] C9 pos cells	SD	[%] C8 pos cells	SD		OA µg/mL	[%] C9 pos cells	SD	[%] C8 pos cells	SD
Ctrl	14.3	0	7.99	4.4406		Ctrl	7.626	3.9941	8.5475	2.3717
40	16.9525	2.0914	12.1233	1.6202		40	11.165	3.4719	28.155	14.729
50	22.1733	0.643	16.8267	1.7974		50	30.8833	4.7857	34.55	8.9803
60	34.1533	8.4049	37.8733	3.447		60	49.43	9.5742	57.745	18.1797
viscumTT	caspase-9		caspase-8			viscumTT	caspase-9		caspase-8
conc. OA+ML	[%] C9 pos cells	SD	[%] C8 pos cells	SD		conc. OA+ML	[%] C9 pos cells	SD	[%] C8 pos cells	SD
Ctrl	14.3	0	7.99	4.4406		Ctrl	7.626	3.9941	8.5475	2.3717
2.5 + 40	20.04	5.4819	13.18	3.7644		2.5 + 40	14.5567	3.5567	26.1567	9.3169
5 + 50	39.36	6.1336	29.4867	7.9944		5 + 50	48.92	10.0716	46.22	7.7499
10 + 60	74.3667	4.3115	63.5667	9.4446		10 + 60	89.6375	4.6647	90.77	7.5312
Inhibition of apoptosis 143B	inhibitor (100µM) z-VAD-fmk					Inhibition of apoptosis SaOS-2	inhibitor (100µM) z-VAD-fmk
viscum concentration						viscum concentration
ML ng/mL	[%]	SD				ML ng/mL	[%]	SD
10	14.4394	5.0791				10	13.9974	2.7997
TT concentration						TT concentration
OA µg/mL	[%]	SD				OA µg/mL	[%]	SD
60	14.7455	0.5931				60	19.7028	9.8207
viscumTT						viscumTT
conc. OA+ML	[%]	SD				conc. OA+ML	[%]	SD
5 + 50	26.7728	8.4417				5 + 50	37.2883	2.6882

## Sheet: Figure 5 osteosarcoma patient
CASY Proliferation
viscum		SD	TT		SD	viscumTT		SD
ng/mL			µg/mL
Ctrl	100	0	Ctrl	100	0	Ctrl	100	0
2.5	91.9891	6.5866	40	97.1171	4.9934	2.5 + 40	94.2632	5.9726
5	86.8614	11.5558	50	92.9962	3.2643	5 + 50	77.1779	9.6296
10	65.6446	11.8124	60	91.2695	7.4024	10 + 60	65.555	1.3828
Anx/PI
viscum		SD	TT		SD	viscumTT		SD
ng/mL	anx pos cells %		µg/mL	anx pos cells %			anx pos cells %
Ctrl	8.2208	1.0525	Ctrl	8.2208	1.0525	Ctrl	8.2208	1.0525
2.5	16.704	3.4156	40	10.3599	2.953	2.5 + 40	24.6498	6.6674
5	21.8426	4.1287	50	11.3887	2.7842	5 + 50	33.6687	5.0336
10	24.8759	1.9716	60	13.6407	4.4669	10 + 60	54.8885	4.9756
JC1 (loss of mitochondrial potential)
viscum		SD	TT		SD	viscumTT		SD
ng/mL	low MMP [%]		µg/mL	low MMP [%]			low MMP [%]
Ctrl	13.48	3.8353	Ctrl	13.48	3.8353	Ctrl	13.48	3.8353
CCCP	91.65	6.9611	CCCP	91.65	6.9611	CCCP	91.65	6.9611
2.5	24.225	3.4423	40	15.85	4.4321	2.5 + 40	26.55	4.5118
5	26.925	2.5184	50	14.65	3.5256	5 + 50	35.075	4.1548
10	27.95	4.5713	60	15.45	4.2028	10 + 60	45.525	10.6841
active CASP3
viscum		SD	TT		SD	viscumTT		SD
ng/mL	CASP3 positive [%]		µg/mL	CASP3 positive [%]			CASP3 positive [%]
Ctrl	7.0467	1.9208	Ctrl	7.0467	1.9208	Ctrl	7.0467	1.9208
2.5	24.6333	6.5729	40	7.61	1.4488	2.5 + 40	28.0667	7.1842
5	27.1333	6.2939	50	9.3733	3.1033	5 + 50	33.3333	7.1515
10	39	9.462	60	11.7933	4.1154	10 + 60	62.1	15.8925
active CASP8
viscum		SD	TT		SD	viscumTT		SD
ng/mL	CASP8 positive [%]		µg/mL	CASP8 positive [%]			CASP8 positive [%]
Ctrl	7.815	3.5143	Ctrl	7.815	3.5143	Ctrl	7.815	3.5143
2.5	26	1.1314	40	9.125	2.2274	2.5 + 40	35.45	0.7778
5	26.6	1.6971	50	10.99	3.5497	5 + 50	38	7.2125
10	37.25	3.4648	60	11.94	4.3275	10 + 60	63.05	9.9702
active CASP9
viscum		SD	TT	SD		viscumTT		SD
ng/mL	CASP9 positive [%]		µg/mL	CASP9 positive [%]			CASP8 positive [%]
Ctrl	6.425	2.6375	Ctrl	6.425	2.6375	Ctrl	6.425	2.6375
2.5	24.35	0.9192	40	8.82	1.9516	2.5 + 40	33.5	4.9497
5	25.2	2.2627	50	10.665	4.575	5 + 50	39.35	7.566
10	34.05	7.0004	60	11.62	4.3558	10 + 60	59.4	6.9296

## Sheet: Figure 6 Cytostatics
Apoptosis induction 143B 48h
Doxo µg/mL	[%] anx pos cells	SD						VP16 µg/mL	[%] anx pos cells	SD						4OOH µg/mL	[%] anx pos cells	SD
ctrl	4.1192	1.3802						ctrl	5.446	1.5943						ctrl	5.446	1.5943
0.1	29.0762	6.5611						0.5	24.056	4.4011						0.5	8.0233	3.0631
viscum concentration	viscum							viscum concentration	viscum							viscum concentration	viscum
ML ng/mL	[%] anx pos cells	SD		viscum + Doxo	[%] anx pos cells	SD		ML ng/mL	[%] anx pos cells	SD		viscum + VP16	[%] anx pos cells	SD		ML ng/mL	[%] anx pos cells	SD		viscum + 4OOH	[%] anx pos cells	SD
ctrl	4.1192	1.3802		Ctrl	4.1192	1.3802		ctrl	5.446	1.5943		Ctrl	5.446	1.5943		ctrl	5.446	1.5943		Ctrl	5.446	1.5943
1.5	18.158	6.5614		1.5 + 0.1	47.5111	8.9673		1.5	23.15	5.43		1.5 + 0.5	52.0775	9.394		1.5	26.1033	5.0037		1.5 + 0.5	35.9167	9.5632
2	26.7583	5.6471		2 + 0.1	49.16	5.49		2	35.13	6.3715		2 + 0.5	61.89	4.9249		2	35.5367	7.3237		2 + 0.5	44.965	1.9021
2.5	36.5	7.45		2.5 + 0.1	58.64	8.05		2.5	41.95	10		2.5 + 0.5	68.8	6.34		2.5	58.06	4.0447		2.5 + 0.5	60.0767	9.1512
TT concentration	TT							TT concentration	TT							TT concentration	TT
OA µg/mL	[%] anx pos cells	SD		TT + Doxo	[%] anx pos cells	SD		OA µg/mL	[%] anx pos cells	SD		TT + VP16	[%] anx pos cells	SD		OA µg/mL	[%] anx pos cells	SD		TT + 4OOH	[%] anx pos cells	SD
Ctrl	4.1192	1.3802		Ctrl	4.1192	1.3802		Ctrl	5.446	1.5943		Ctrl	5.446	1.5943		Ctrl	5.446	1.5943		Ctrl	5.446	1.5943
20	13.188	3.7644		20 + 0.1	51.98	9.51		20	16.99	6.9345		20 + 0.5	51.225	2.8232		20	16.67	7.9202		20 + 0.5	20.9033	3.6609
30	23.1	5.53		30 + 0.1	57.6	3.29		30	25.97	9.03		30 + 0.5	61.12	5.989		30	27.9533	9.3009		30 + 0.5	29.64	8.016
40	40.5	5.3		40 + 0.1	73.26	5.67		40	44.61	5.74		40 + 0.5	77.8	5.84		40	46.535	2.8355		40 + 0.5	58.24	0.2828
viscumTT	viscumTT							viscumTT	viscumTT							viscumTT	viscumTT
conc. OA+ML	[%] anx pos cells	SD		viscumTT + Doxo	[%] anx pos cells	SD		conc. OA+ML	[%] anx pos cells	SD		viscumTT + VP16	[%] anx pos cells	SD		conc. OA+ML	[%] anx pos cells	SD		viscumTT + 4OOH	[%] anx pos cells	SD
Ctrl	4.1192	1.3802		Ctrl	4.1192	1.3802		Ctrl	5.446	1.5943		Ctrl	5.446	1.5943		Ctrl	5.446	1.5943		Ctrl	5.446	1.5943
1.5 + 20	20.96	6.32		1.5 + 20 + 0.1	48.77	9.75		1.5 + 20	25.63	2.17		1.5 + 20 + 0.5	51.47	9.21		1.5 + 20	25.4933	2.9962		1.5 + 20 + 0.5	35.2767	0.8127
2 + 30	40.4167	8.5066		2 + 30 + 0.1	73.1033	7.4403		2 + 30	48.79	2.09		2 + 30 + 0.5	81.546	6.1031		2 + 30	49.0167	2.5105		2 + 30 + 0.5	57.02	5.8124
2.5 + 40	61.6871	10.986		2.5 + 40 + 0.1	85.8183	6.4343		2.5 + 40	73.24	6.2337		2.5 + 40 + 0.5	90.2575	4.7599		2.5 + 40	76.0733	6.3916		2.5 + 40 + 0.5	89.1667	5.5721
Apoptosis induction SaOS-2 48h
Doxo µg/mL	[%] anx pos cells	SD						VP16 µg/mL	[%] anx pos cells	SD						4OOH µg/mL	[%] anx pos cells	SD
ctrl	7.255	0.3041						ctrl	9.66	2.7269						ctrl	9.266	2.7749
0.05	25.49	3.1961						0.5	22.182	1.9571						0.5	15.55	3.2806
viscum concentration	viscum							viscum concentration	viscum							viscum concentration	viscum
ML ng/mL	[%] anx pos cells	SD		viscum + Doxo	[%] anx pos cells	SD		ML ng/mL	[%] anx pos cells	SD		viscum + VP16	[%] anx pos cells	SD		ML ng/mL	[%] anx pos cells	SD		viscum + 4OOH	[%] anx pos cells	SD
ctrl	7.255	0.3041		Ctrl	7.255	0.3041		ctrl	9.66	2.7269		Ctrl	9.66	2.7269		ctrl	9.266	2.7749		Ctrl	9.266	2.7749
1.5	13.13	3.6628		1.5 + 1	25.63	0.2404		1.5	12.712	2.8209		1.5 + 0.5	22.64	1.085		1.5	13.27	2.32		1.5 + 0.5	16.774	1.928
2	14.235	2.7506		2 + 1	28.595	0.4031		2	13.518	3.1025		2 + 0.5	23.854	1.9107		2	14.57	2.3252		2 + 0.5	18.876	3.0304
2.5	13.41	1.4142		2.5 + 1	30.425	4.1931		2.5	14.538	4.2742		2.5 + 0.5	26.582	3.504		2.5	15.906	3.6096		2.5 + 0.5	20.042	2.4364
TT concentration	TT							TT concentration	TT							TT concentration	TT
OA µg/mL	[%] anx pos cells	SD		TT + Doxo	[%] anx pos cells	SD		OA µg/mL	[%] anx pos cells	SD		TT + VP16	[%] anx pos cells	SD		OA µg/mL	[%] anx pos cells	SD		TT + 4OOH	[%] anx pos cells	SD
Ctrl	7.255	0.3041		Ctrl	7.255	0.3041		Ctrl	9.66	2.7269		Ctrl	9.66	2.7269		Ctrl	9.266	2.7749		Ctrl	9.266	2.7749
20	13.425	2.1142		20 + 1	29.205	1.1667		20	14.812	1.994		20 + 0.5	26.518	4.0031		20	15.954	3.0011		20 + 0.5	24.602	3.6071
30	22.18	5.176		30 + 1	33.745	3.4295		30	21.538	5.4689		30 + 0.5	32.63	4.4699		30	22.934	3.6769		30 + 0.5	32.83	4.9486
40	43.24	8.2873		40 + 1	49.91	4.78		40	39.484	7.1078		40 + 0.5	45.936	5.9826		40	39.922	6.4378		40 + 0.5	45.7	4.2007
viscumTT	viscumTT							viscumTT	viscumTT							viscumTT	viscumTT
conc. OA+ML	[%] anx pos cells	SD		viscumTT + Doxo	[%] anx pos cells	SD		conc. OA+ML	[%] anx pos cells	SD		viscumTT + VP16	[%] anx pos cells	SD		conc. OA+ML	[%] anx pos cells	SD		viscumTT + 4OOH	[%] anx pos cells	SD
Ctrl	7.255	0.3041		Ctrl	7.255	0.3041		Ctrl	9.66	2.7269		Ctrl	9.66	2.7269		Ctrl	9.266	2.7749		Ctrl	9.266	2.7749
1.5 + 20	16.02	2.4749		1.5 + 20 + 1	32.97	7.4812		1.5 + 20	18.666	6.2527		1.5 + 20 + 0.5	26.902	1.9939		1.5 + 20	19.574	5.7752		1.5 + 20 + 0.5	22.82	2.6433
2 + 30	30.885	5.8761		2 + 30 + 1	46.97	15.1887		2 + 30	30.094	5.8222		2 + 30 + 0.5	35.298	3.698		2 + 30	29.454	6.6861		2 + 30 + 0.5	32.37	3.6343
2.5 + 40	53.36	10.4793		2.5 + 40 + 1	58.855	10.3874		2.5 + 40	47.266	7.6969		2.5 + 40 + 0.5	52.072	9.0937		2.5 + 40	47.012	7.9115		2.5 + 40 + 0.5	51.18	10.8496
